# Supplementary material for: Identification of Genes Involved in Antifungal Activity of Burkholderia seminalis Against Rhizoctonia solani Using Tn5 Transposon Mutation Method
Source: PubMed Central journal article supplement (PMC7600168; doi:10.3390/pathogens9100797), 2020-09-27
Supplement: pathogens-09-00797-s001.pdf [file pathogens-09-00797-s001.pdf]

**Supplementary Table S1.** Primers used in this study.

| Primers Name                                                     | Sequences (5'-3')                             | T <sub>m</sub> (°C) | CG (%) |
|------------------------------------------------------------------|-----------------------------------------------|---------------------|--------|
| <b>Identification of Tn5 mutants</b>                             |                                               |                     |        |
| Kan-F                                                            | AAGGTAGCGTTGCCAATGAT                          | 56                  | 45     |
| Kan-R                                                            | GCCGTTTCTGTAATGAAGGA                          | 53                  | 45     |
| <b>Amplification of unknown sequence flanking transposon Tn5</b> |                                               |                     |        |
| KAN-2 FP-1 F                                                     | ACCTACAACAAAGCTCTCATCAACC                     | 58                  | 44     |
| KAN-2 RP-1 R                                                     | GCAATGTAACATCAGAGATTTTGAG                     | 54                  | 36     |
| <b>Insertion site-specific primers</b>                           |                                               |                     |        |
| 30-F                                                             | GGACGAGGTGCTCGAATTCG                          | 59                  | 60     |
| 30-R                                                             | TGGTTGCCTACCGCATCGC                           | 61                  | 63     |
| 45-F                                                             | CGCCTGATGCAAAGCATGC                           | 59                  | 58     |
| 45-R                                                             | GTGCTGCCTTCTTCGCAGC                           | 60                  | 63     |
| 63-F                                                             | GGTGGATTCTTCGCAGCGC                           | 60                  | 63     |
| 63-R                                                             | CTCTGGCCCCGAAGCCAA                            | 58                  | 65     |
| 145-F                                                            | ACGGTTTCGCAATGAGGGC                           | 59                  | 58     |
| 145-R                                                            | GGCTCGAACAGTCGGTGAAG                          | 59                  | 60     |
| 146-F                                                            | TTAATCCGGGCATCGGTAAT                          | 56                  | 50     |
| 146-R                                                            | CCTCGTCGCCTGTGACTA                            | 60                  | 63     |
| 158/355-F                                                        | CGCATTGGGAGGCCTTTGAT                          | 59                  | 55     |
| 158/355-R                                                        | TCGCCATCTGTCAATTGACG                          | 57                  | 45     |
| 216-F                                                            | TCGATGTCCAGCTCGAGCTC                          | 59                  | 60     |
| 216-R                                                            | ACTTCAGGCGTTCCGTTTCA                          | 58                  | 50     |
| 225-F                                                            | GCTGATGTTTCAGGTGTTCCGGC                       | 60                  | 57     |
| 225-R                                                            | GCGATTCCTGCAGGCTCAC                           | 60                  | 60     |
| 273-F                                                            | GGACTGGGAAGTGAACCGC                           | 59                  | 63     |
| 273-R                                                            | CGCAACTGCGAGTGCGA                             | 60                  | 65     |
| 331-F                                                            | ATAACCTTGCTTCTTGCCTGT                         | 58                  | 45     |
| 331-R                                                            | GTCGGGCACGTCGAGGATTC                          | 61                  | 65     |
| <b>Gene knock-out primers</b>                                    |                                               |                     |        |
| k30-F                                                            | CGGGATCCTGAATCGAGACGTCTGTGTCGC                | 60                  | 55     |
| k30-R                                                            | CGGAATTC <del>CCCC</del> CATGTTTCATGGTCTTGAGC | 59                  | 55     |
| k45-F                                                            | CGGGATCCAGGTTGCTGCCAAGAAGACC                  | 58                  | 55     |
| k45-R                                                            | CGGAATTCGGGTTGAGCGCGGTCTTC                    | 59                  | 67     |
| k63-F                                                            | TGCTCTAGAAATTTAACGCTGCTCCGGCT                 | 58                  | 50     |
| k63-R                                                            | CGGAATTC <del>TTG</del> CGCAGCAGT             | 59                  | 63     |
| k216-F                                                           | CGGGATCCTATCCGCTTCCGTTTCGCGT                  | 60                  | 58     |
| k216-R                                                           | CGGAATTC <del>TT</del> CGGTTTCACGTGAAACAGCG   | 60                  | 50     |
| k225-F                                                           | CGGGATCCGTCGCGTTC <del>TT</del> CGGGTTGC      | 60                  | 63     |
| k225-R                                                           | CGGAATTCGCGGGCAATTCAGCCAAGC                   | 61                  | 63     |
| k331-F                                                           | CGGGATCCCTGTGGAGCCTGTACAACGC                  | 59                  | 60     |
| k331-R                                                           | CGGAATTC <del>CT</del> TGCTTCTTGCCTGTTCC      | 58                  | 55     |
| <b>Gene complementation primers</b>                              |                                               |                     |        |
| c30-F                                                            | AGCTCGAAT <u>CTAGAC</u> CGTGTCCCGTCCTACTACG   | 58                  | 60     |
| c30-R                                                            | GCAGAAGCT <u>CTAGAT</u> TCCTTACTCCAGCAGGCCG   | 60                  | 60     |
| c45-F                                                            | AGCTCGAAT <u>CTAGAA</u> ACGCAACTTCTTCGAGACGC  | 59                  | 52     |
| c45-R                                                            | GCAGAAGCT <u>CTAGAG</u> CGGATTACGGACGGCTGC    | 60                  | 67     |
| c63-F                                                            | AGCTCGAAT <u>CTAGAG</u> GGGCGGAAATGGTGATG     | 58                  | 61     |
| c63-R                                                            | GCAGAAGCT <u>CTAGAT</u> CAGTAGGCTGCAATGTTTTCC | 56                  | 45     |
| c216-F                                                           | AGCTCGAAT <u>CTAGAG</u> TGGCGGGAAACGAACGG     | 60                  | 63     |
| c216-R                                                           | GCAGAAGCT <u>CTAGAC</u> GTGCTATTGTTGCGTCGGGAC | 60                  | 60     |
| c225-F                                                           | AGCTCGAAT <u>CTAGAG</u> TATTGCCGCTCATCGTCTGGA | 60                  | 55     |
| c225-R                                                           | GCAGAAGCT <u>CTAGAG</u> CAGCTTCAGCAGGAACGAG   | 59                  | 60     |
| c331-F                                                           | AGCTCGAAT <u>CTAGAA</u> CGCGGTGACCAGTATGTC    | 60                  | 60     |
| c331-R                                                           | GCAGAAGCT <u>CTAGAA</u> ATGTCCTCGTGTGCTTCAG   | 56                  | 60     |

Note: Nucleotides with underline indicated restriction sites of the enzymes: *Bam*HI, *Eco*RI, or *Xba*I.
